## Correction for: Real-world effectiveness of medications on survival in patients with COPD-heart failure overlap

Vincent Yi-Fong Su<sup>1,3,4,\*</sup>, Yao-Hsu Yang<sup>8,9,10,12\*</sup>, Diahn-Warng Perng<sup>2,3</sup>, Ying-Huang Tsai<sup>7,11</sup>, Kun-Ta Chou<sup>2,3,4</sup>, Kang-Cheng Su<sup>2,3</sup>, Wei-Juin Su<sup>2,3</sup>, Pau-Chung Chen<sup>13</sup>, Kuang-Yao Yang<sup>2,3,5,6</sup>

<sup>1</sup>Department of Internal Medicine, Taipei City Hospital, Taipei City Government, Taipei, Taiwan

<sup>2</sup>Department of Chest Medicine, Taipei Veterans General Hospital, Taipei, Taiwan

<sup>3</sup>Faculty of Medicine, School of Medicine, National Yang-Ming University, Taipei, Taiwan

<sup>4</sup>Institute of Clinical Medicine, National Yang-Ming University, Taipei, Taiwan

<sup>5</sup>Institute of Emergency and Critical Care Medicine, National Yang-Ming University, Taipei, Taiwan

<sup>6</sup>Cancer Progression Research Center, National Yang-Ming University, Taipei, Taiwan

<sup>7</sup>Division of Pulmonary and Critical Care Medicine and Department of Respiratory Care, Chang Gung Memorial Hospital, Chiayi, Taiwan

<sup>8</sup>Health Information and Epidemiology Laboratory, Chang Gung Memorial Hospital, Chiayi, Taiwan

<sup>9</sup>Department of Traditional Chinese Medicine, Chang Gung Memorial Hospital, Chiayi, Taiwan

<sup>10</sup>School of Traditional Chinese Medicine, College of Medicine, Chang Gung University, Taoyuan, Taiwan

<sup>11</sup>Department of Respiratory Therapy, Chang Gung University, Taoyuan, Taiwan

<sup>12</sup>Institute of Occupational Medicine and Industrial Hygiene, National Taiwan University College of Public Health, Taipei, Taiwan

<sup>13</sup>Department of Environmental and Occupational Medicine, National Taiwan University Hospital and National Taiwan University College of Medicine, Taipei, Taiwan

\*Equal contribution

Correspondence to: Kuang-Yao Yang; email: [kyyang@vghtpe.gov.tw](mailto:kyyang@vghtpe.gov.tw)

Original article: [Aging \(Albany NY\) 2019; 11: 3650-3667.](#)

PMCID: PMC6594806 PMID: 31175265 doi: 10.18632/aging.102004

**This article has been corrected:** Due to production mistake the wrong Figure 2 was posted in this paper. The authors declare that this correction does not change the results or conclusions of this paper. The correct Figure 2 is provided below.

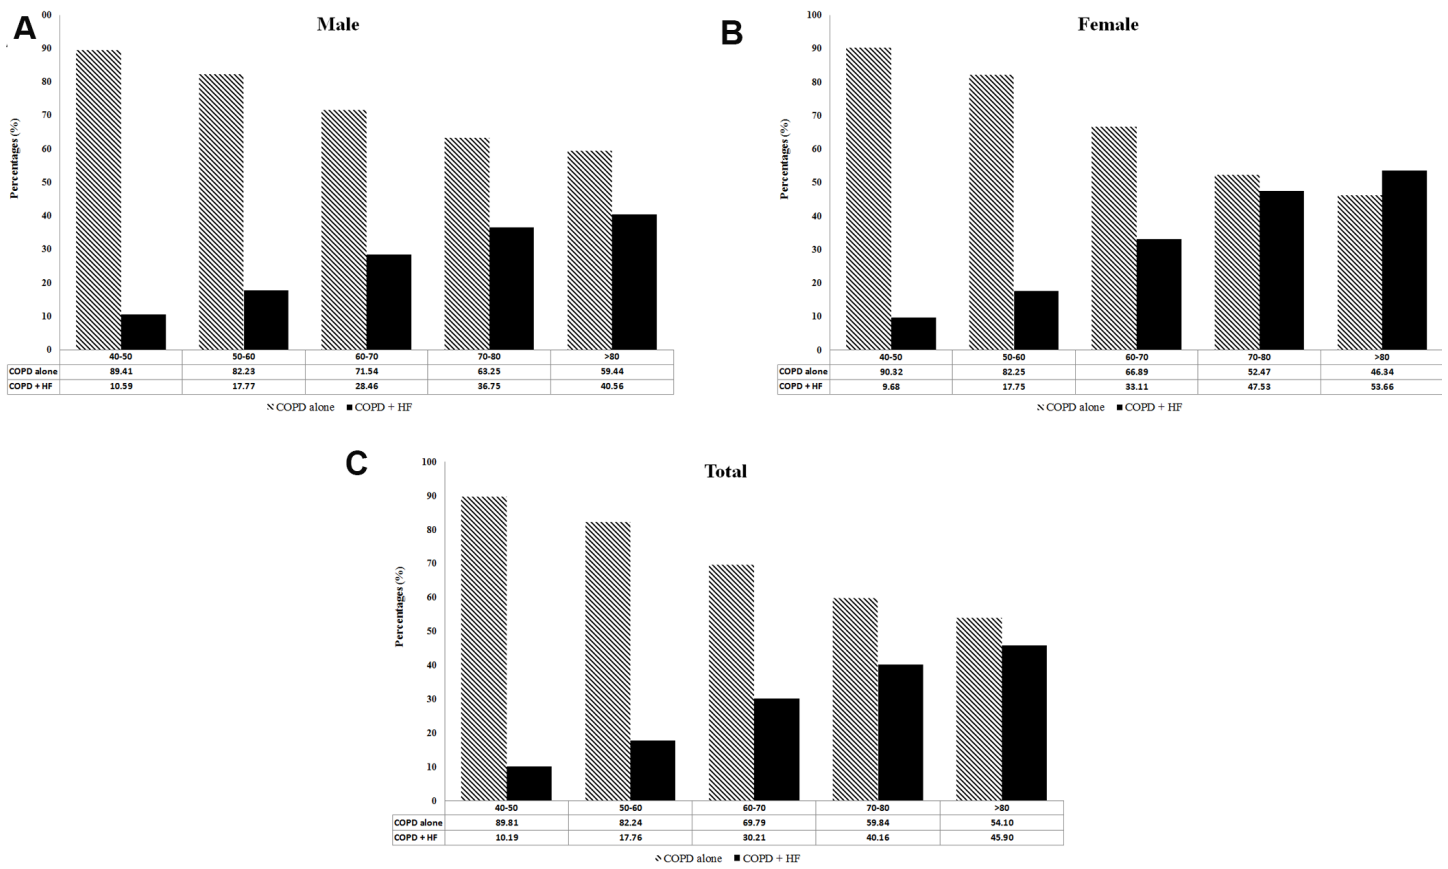

**Figure 2.** (A) Percentage of patients with COPD-heart failure overlap (COPD+HF) in different age groups. (B) Percentage of patients with COPD-heart failure overlap (COPD+HF) in different age groups in male sex. (C) Percentage of patients with COPD-heart failure overlap (COPD+HF) in different age groups in female sex.
